# Supplementary material for: Meal timing, meal frequency, and breakfast skipping in adult individuals with type 1 diabetes – associations with glycaemic control
Source: PubMed Central journal article supplement (PMC6934661; doi:10.1038/s41598-019-56541-5), 2019-12-27
Supplement: 41598_2019_56541_MOESM1_ESM.pdf [file 41598_2019_56541_MOESM1_ESM.pdf]

**Meal timing, meal frequency, and breakfast skipping in adult individuals with type 1 diabetes – associations with glycaemic control**

Aila J. Ahola<sup>a,b,c</sup>, Stefan Mutter<sup>a,b,c</sup>, Carol Forsblom<sup>a,b,c</sup>, Valma Harjutsalo<sup>a,b,c,d</sup>, Per-Henrik Groop<sup>a,b,c,e,\*</sup>

<sup>a</sup>Folkhälsan Institute of Genetics, Folkhälsan Research Center, Helsinki, Finland;

<sup>b</sup>Abdominal Center Nephrology, University of Helsinki and Helsinki University Central

Hospital, Helsinki, Finland; <sup>c</sup>Research Program for Clinical and Molecular Metabolism,

Faculty of Medicine, University of Helsinki, Finland; <sup>d</sup>Diabetes Prevention Unit, National

Institute for Health and Welfare, Helsinki, Finland; <sup>e</sup>Department of Diabetes, Central

Clinical School, Monash University, Melbourne, Victoria, Australia.

**\*Corresponding author:** Per-Henrik Groop, Folkhälsan Research Center, Biomedicum Helsinki C318b, PO Box 63, FI-00014 University of Helsinki, Finland. Tel +358 500 430436. Email: per-henrik.groop@helsinki.fi

## The Finnish Diabetic Nephropathy Study Centers

|                                                                                         |                                                                                                                                                                                                                                                                                                                                                                                                                                                                                                                                                                                                                                                                                                                                                                                                                                                                                                                                                                                                                                                                                                                                                                                                                                                                                                                                                                                                                                                                                                                                                                                                                                                                                                                                                                                         |
|-----------------------------------------------------------------------------------------|-----------------------------------------------------------------------------------------------------------------------------------------------------------------------------------------------------------------------------------------------------------------------------------------------------------------------------------------------------------------------------------------------------------------------------------------------------------------------------------------------------------------------------------------------------------------------------------------------------------------------------------------------------------------------------------------------------------------------------------------------------------------------------------------------------------------------------------------------------------------------------------------------------------------------------------------------------------------------------------------------------------------------------------------------------------------------------------------------------------------------------------------------------------------------------------------------------------------------------------------------------------------------------------------------------------------------------------------------------------------------------------------------------------------------------------------------------------------------------------------------------------------------------------------------------------------------------------------------------------------------------------------------------------------------------------------------------------------------------------------------------------------------------------------|
| Anjalankoski Health Center                                                              | S.Koivula, T.Uggeldahl                                                                                                                                                                                                                                                                                                                                                                                                                                                                                                                                                                                                                                                                                                                                                                                                                                                                                                                                                                                                                                                                                                                                                                                                                                                                                                                                                                                                                                                                                                                                                                                                                                                                                                                                                                  |
| Central Finland Central Hospital, Jyväskylä                                             | T.Forslund, A.Halonen, A.Koistinen, P.Koskiaho,<br>M.Laukkanen, J.Salveo, M.Tiihonen                                                                                                                                                                                                                                                                                                                                                                                                                                                                                                                                                                                                                                                                                                                                                                                                                                                                                                                                                                                                                                                                                                                                                                                                                                                                                                                                                                                                                                                                                                                                                                                                                                                                                                    |
| Central Hospital of Åland Islands, Mariehamn                                            | M.Forsen, H.Granlund, A.-C.Jonsson, B.Nyroos                                                                                                                                                                                                                                                                                                                                                                                                                                                                                                                                                                                                                                                                                                                                                                                                                                                                                                                                                                                                                                                                                                                                                                                                                                                                                                                                                                                                                                                                                                                                                                                                                                                                                                                                            |
| Central Hospital of Kanta-Häme, Hämeenlinna                                             | P.Kinnunen, A.Orvola, T.Salonen, A.Vähänen                                                                                                                                                                                                                                                                                                                                                                                                                                                                                                                                                                                                                                                                                                                                                                                                                                                                                                                                                                                                                                                                                                                                                                                                                                                                                                                                                                                                                                                                                                                                                                                                                                                                                                                                              |
| Central Hospital of Kymenlaakso, Kotka                                                  | R.Paldanius, M.Riihelä, L.Ryysy                                                                                                                                                                                                                                                                                                                                                                                                                                                                                                                                                                                                                                                                                                                                                                                                                                                                                                                                                                                                                                                                                                                                                                                                                                                                                                                                                                                                                                                                                                                                                                                                                                                                                                                                                         |
| Central Hospital of Länsi-Pohja, Kemi                                                   | H.Laukkanen, P.Nyländen, A.Sademies                                                                                                                                                                                                                                                                                                                                                                                                                                                                                                                                                                                                                                                                                                                                                                                                                                                                                                                                                                                                                                                                                                                                                                                                                                                                                                                                                                                                                                                                                                                                                                                                                                                                                                                                                     |
| Central Ostrobothnian Hospital District, Kokkola                                        | S.Anderson, B.Asplund, U.Byskata, P.Liedes,<br>M.Kuusela, T.Virkkala                                                                                                                                                                                                                                                                                                                                                                                                                                                                                                                                                                                                                                                                                                                                                                                                                                                                                                                                                                                                                                                                                                                                                                                                                                                                                                                                                                                                                                                                                                                                                                                                                                                                                                                    |
| City of Espoo Health Center:                                                            |                                                                                                                                                                                                                                                                                                                                                                                                                                                                                                                                                                                                                                                                                                                                                                                                                                                                                                                                                                                                                                                                                                                                                                                                                                                                                                                                                                                                                                                                                                                                                                                                                                                                                                                                                                                         |
| Espoonlahti                                                                             | A.Nikkola, E.Ritola                                                                                                                                                                                                                                                                                                                                                                                                                                                                                                                                                                                                                                                                                                                                                                                                                                                                                                                                                                                                                                                                                                                                                                                                                                                                                                                                                                                                                                                                                                                                                                                                                                                                                                                                                                     |
| Tapiola                                                                                 | M.Niska, H.Saarinen                                                                                                                                                                                                                                                                                                                                                                                                                                                                                                                                                                                                                                                                                                                                                                                                                                                                                                                                                                                                                                                                                                                                                                                                                                                                                                                                                                                                                                                                                                                                                                                                                                                                                                                                                                     |
| Samarina                                                                                | E.Oukko-Ruonen, T.Virtanen                                                                                                                                                                                                                                                                                                                                                                                                                                                                                                                                                                                                                                                                                                                                                                                                                                                                                                                                                                                                                                                                                                                                                                                                                                                                                                                                                                                                                                                                                                                                                                                                                                                                                                                                                              |
| Viherlaakso                                                                             | A.Lyytinen                                                                                                                                                                                                                                                                                                                                                                                                                                                                                                                                                                                                                                                                                                                                                                                                                                                                                                                                                                                                                                                                                                                                                                                                                                                                                                                                                                                                                                                                                                                                                                                                                                                                                                                                                                              |
| City of Helsinki Health Center:                                                         |                                                                                                                                                                                                                                                                                                                                                                                                                                                                                                                                                                                                                                                                                                                                                                                                                                                                                                                                                                                                                                                                                                                                                                                                                                                                                                                                                                                                                                                                                                                                                                                                                                                                                                                                                                                         |
| Puistola                                                                                | H.Kari, T.Simonen                                                                                                                                                                                                                                                                                                                                                                                                                                                                                                                                                                                                                                                                                                                                                                                                                                                                                                                                                                                                                                                                                                                                                                                                                                                                                                                                                                                                                                                                                                                                                                                                                                                                                                                                                                       |
| Suutarila                                                                               | A.Kaprio, J.Kärkkäinen, B.Rantaeskola                                                                                                                                                                                                                                                                                                                                                                                                                                                                                                                                                                                                                                                                                                                                                                                                                                                                                                                                                                                                                                                                                                                                                                                                                                                                                                                                                                                                                                                                                                                                                                                                                                                                                                                                                   |
| Töölö                                                                                   | P.Kääriäinen, J.Haaga, A.-L.Pietiläinen                                                                                                                                                                                                                                                                                                                                                                                                                                                                                                                                                                                                                                                                                                                                                                                                                                                                                                                                                                                                                                                                                                                                                                                                                                                                                                                                                                                                                                                                                                                                                                                                                                                                                                                                                 |
| City of Hyvinkää Health Center                                                          | S.Klemetti, T.Nyandoto, E.Rontu, S.Satuli-Autere                                                                                                                                                                                                                                                                                                                                                                                                                                                                                                                                                                                                                                                                                                                                                                                                                                                                                                                                                                                                                                                                                                                                                                                                                                                                                                                                                                                                                                                                                                                                                                                                                                                                                                                                        |
| City of Vantaa Health Center:                                                           |                                                                                                                                                                                                                                                                                                                                                                                                                                                                                                                                                                                                                                                                                                                                                                                                                                                                                                                                                                                                                                                                                                                                                                                                                                                                                                                                                                                                                                                                                                                                                                                                                                                                                                                                                                                         |
| Korso                                                                                   | R.Toivonen, H.Virtanen                                                                                                                                                                                                                                                                                                                                                                                                                                                                                                                                                                                                                                                                                                                                                                                                                                                                                                                                                                                                                                                                                                                                                                                                                                                                                                                                                                                                                                                                                                                                                                                                                                                                                                                                                                  |
| Länsimäki                                                                               | R.Ahonen, M.Ivaska-Suomela, A.Jauhiainen                                                                                                                                                                                                                                                                                                                                                                                                                                                                                                                                                                                                                                                                                                                                                                                                                                                                                                                                                                                                                                                                                                                                                                                                                                                                                                                                                                                                                                                                                                                                                                                                                                                                                                                                                |
| Martinlaakso                                                                            | M.Laine, T.Pellonpää, R.Puranen                                                                                                                                                                                                                                                                                                                                                                                                                                                                                                                                                                                                                                                                                                                                                                                                                                                                                                                                                                                                                                                                                                                                                                                                                                                                                                                                                                                                                                                                                                                                                                                                                                                                                                                                                         |
| Myyrmäki                                                                                | A.Airas, J.Laakso, K.Rautavaara                                                                                                                                                                                                                                                                                                                                                                                                                                                                                                                                                                                                                                                                                                                                                                                                                                                                                                                                                                                                                                                                                                                                                                                                                                                                                                                                                                                                                                                                                                                                                                                                                                                                                                                                                         |
| Rekola                                                                                  | M.Erola, E.Jatkola                                                                                                                                                                                                                                                                                                                                                                                                                                                                                                                                                                                                                                                                                                                                                                                                                                                                                                                                                                                                                                                                                                                                                                                                                                                                                                                                                                                                                                                                                                                                                                                                                                                                                                                                                                      |
| Tikkurila                                                                               | R.Lönnblad, A.Malm, J.Mäkelä, E.Rautamo                                                                                                                                                                                                                                                                                                                                                                                                                                                                                                                                                                                                                                                                                                                                                                                                                                                                                                                                                                                                                                                                                                                                                                                                                                                                                                                                                                                                                                                                                                                                                                                                                                                                                                                                                 |
| Heinola Health Center                                                                   | P.Hentunen, J.Lagerstam                                                                                                                                                                                                                                                                                                                                                                                                                                                                                                                                                                                                                                                                                                                                                                                                                                                                                                                                                                                                                                                                                                                                                                                                                                                                                                                                                                                                                                                                                                                                                                                                                                                                                                                                                                 |
| Helsinki University Central Hospital, Department of<br>Medicine, Division of Nephrology | M.Fedoroff, D.Gordin, O.Heikkilä, K.Hietala, J.Fagerudd, M.Korolainen,<br>L.Kyllönen, J.Kytö, S.Lindh, K.Pettersson-Fernholm, M.Rosengård-Bärlund,<br>A.Sandelin, L.Thorn, J.Tuomikangas, T.Vesisenaho, J.Wadén<br>V.Sipilä<br>T.Kalliomäki, J.Koskelainen, R.Nikkanen,<br>N.Savolainen, H.Sulonen, E.Valtonen<br>L. Norvio, A.Hämäläinen<br>E.Toivanen<br>A.Parta, I.Pirttiniemi<br>S.Aranko, S.Ervasti, R.Kauppinen-Mäkelin,<br>A.Kuusisto, T.Leppälä, K.Nikkilä, L.Pekkonen<br>K.Nuorva, M.Tiihonen<br>S.Jokelainen, K.Kananen, M.Karjalainen, P.Kemppainen, A.-M.Mankinen,<br>M.Sankari<br>H.Stuckey, P.Suominen<br>A.Lappalainen, M.Liimatainen, J.Santaholma<br>A.Aimolahti, E.Huovinen<br>V.Iikka, M.Lehtimäki<br>E.Pälikkö-Kontinen, A.Vanhanen<br>E.Koskinen, T.Siitonen<br>E.Huttunen, R.Ikäheimo, P.Karhapää, P.Kekäläinen,<br>M.Laakso, T.Lakka, E.Lampainen, L.Moilanen, S. Tanskanen<br>L.Niskanen, U.Tuovinen, I.Vauhkonen, E.Voutilainen<br>T.Kääriäinen, E.Isopoussu<br>E.Kilkki, I.Koskinen, L.Riihelä<br>T.Meriläinen, P.Poukka, R.Savolainen, N.Uhlenius<br>A.Mäkelä, M.Tanner<br>L.Hyvärinen, K.Lampela, S.Pöykkö, T.Rompasaari, S.Severinkangas, T.Tulokas<br>P. Erola, L.Härkönen, P.Linkola, T.Pekkanen, I.Pulli, E.Repo<br>T.Granlund, K.Hietanen, M.Porrassalmi, M.Saari, T.Salonen, M.Tiikkainen,<br>I.-M.Jousmaa, J.Rinne<br>A.Mäkelä, P.Eloranta<br>H.Lanki, S.Moilanen, M.Tilly-Kiesi<br>A.Gynther, R.Manninen, P.Nironen, M.Salminen,<br>T.Vänttinen<br>I.Pirttiniemi, A.-M.Hänninen<br>U.-M.Henttula, P.Kekäläinen, M.Pietarinen,<br>A.Rissanen, M.Voutilainen<br>A.Burgos, K.Urtamo<br>E.Jokelainen, P.-L.Jylkkä, E.Kaarlela, J.Vuolaspuro<br>L.Hiltunen, R.Häkkinen, S.Keinänen-Kiukaanniemi<br>R.Ikäheimo<br>H.Haapamäki, A.Helanterä, S.Hämäläinen, |
| Herttoniemi Hospital, Helsinki                                                          |                                                                                                                                                                                                                                                                                                                                                                                                                                                                                                                                                                                                                                                                                                                                                                                                                                                                                                                                                                                                                                                                                                                                                                                                                                                                                                                                                                                                                                                                                                                                                                                                                                                                                                                                                                                         |
| Hospital of Lounais-Häme, Forssa                                                        |                                                                                                                                                                                                                                                                                                                                                                                                                                                                                                                                                                                                                                                                                                                                                                                                                                                                                                                                                                                                                                                                                                                                                                                                                                                                                                                                                                                                                                                                                                                                                                                                                                                                                                                                                                                         |
| Hyvinkää Hospital                                                                       |                                                                                                                                                                                                                                                                                                                                                                                                                                                                                                                                                                                                                                                                                                                                                                                                                                                                                                                                                                                                                                                                                                                                                                                                                                                                                                                                                                                                                                                                                                                                                                                                                                                                                                                                                                                         |
| Iisalmi Hospital                                                                        |                                                                                                                                                                                                                                                                                                                                                                                                                                                                                                                                                                                                                                                                                                                                                                                                                                                                                                                                                                                                                                                                                                                                                                                                                                                                                                                                                                                                                                                                                                                                                                                                                                                                                                                                                                                         |
| Jokilaakso Hospital, Jämsä                                                              |                                                                                                                                                                                                                                                                                                                                                                                                                                                                                                                                                                                                                                                                                                                                                                                                                                                                                                                                                                                                                                                                                                                                                                                                                                                                                                                                                                                                                                                                                                                                                                                                                                                                                                                                                                                         |
| Jorvi Hospital, Helsinki University Central Hospital                                    |                                                                                                                                                                                                                                                                                                                                                                                                                                                                                                                                                                                                                                                                                                                                                                                                                                                                                                                                                                                                                                                                                                                                                                                                                                                                                                                                                                                                                                                                                                                                                                                                                                                                                                                                                                                         |
| Jyväskylä Health Center, Kyllö                                                          |                                                                                                                                                                                                                                                                                                                                                                                                                                                                                                                                                                                                                                                                                                                                                                                                                                                                                                                                                                                                                                                                                                                                                                                                                                                                                                                                                                                                                                                                                                                                                                                                                                                                                                                                                                                         |
| Kainuu Central Hospital, Kajaani                                                        |                                                                                                                                                                                                                                                                                                                                                                                                                                                                                                                                                                                                                                                                                                                                                                                                                                                                                                                                                                                                                                                                                                                                                                                                                                                                                                                                                                                                                                                                                                                                                                                                                                                                                                                                                                                         |
| A.Reponen                                                                               |                                                                                                                                                                                                                                                                                                                                                                                                                                                                                                                                                                                                                                                                                                                                                                                                                                                                                                                                                                                                                                                                                                                                                                                                                                                                                                                                                                                                                                                                                                                                                                                                                                                                                                                                                                                         |
| Kerava Health Center                                                                    |                                                                                                                                                                                                                                                                                                                                                                                                                                                                                                                                                                                                                                                                                                                                                                                                                                                                                                                                                                                                                                                                                                                                                                                                                                                                                                                                                                                                                                                                                                                                                                                                                                                                                                                                                                                         |
| Kirkkonummi Health Center                                                               |                                                                                                                                                                                                                                                                                                                                                                                                                                                                                                                                                                                                                                                                                                                                                                                                                                                                                                                                                                                                                                                                                                                                                                                                                                                                                                                                                                                                                                                                                                                                                                                                                                                                                                                                                                                         |
| Kivelä Hospital, Helsinki                                                               |                                                                                                                                                                                                                                                                                                                                                                                                                                                                                                                                                                                                                                                                                                                                                                                                                                                                                                                                                                                                                                                                                                                                                                                                                                                                                                                                                                                                                                                                                                                                                                                                                                                                                                                                                                                         |
| Koskela Hospital, Helsinki                                                              |                                                                                                                                                                                                                                                                                                                                                                                                                                                                                                                                                                                                                                                                                                                                                                                                                                                                                                                                                                                                                                                                                                                                                                                                                                                                                                                                                                                                                                                                                                                                                                                                                                                                                                                                                                                         |
| Kotka Health Center                                                                     |                                                                                                                                                                                                                                                                                                                                                                                                                                                                                                                                                                                                                                                                                                                                                                                                                                                                                                                                                                                                                                                                                                                                                                                                                                                                                                                                                                                                                                                                                                                                                                                                                                                                                                                                                                                         |
| Kouvola Health Center                                                                   |                                                                                                                                                                                                                                                                                                                                                                                                                                                                                                                                                                                                                                                                                                                                                                                                                                                                                                                                                                                                                                                                                                                                                                                                                                                                                                                                                                                                                                                                                                                                                                                                                                                                                                                                                                                         |
| Kuopio University Hospital                                                              |                                                                                                                                                                                                                                                                                                                                                                                                                                                                                                                                                                                                                                                                                                                                                                                                                                                                                                                                                                                                                                                                                                                                                                                                                                                                                                                                                                                                                                                                                                                                                                                                                                                                                                                                                                                         |
| Kuusamo Health Center                                                                   |                                                                                                                                                                                                                                                                                                                                                                                                                                                                                                                                                                                                                                                                                                                                                                                                                                                                                                                                                                                                                                                                                                                                                                                                                                                                                                                                                                                                                                                                                                                                                                                                                                                                                                                                                                                         |
| Kuusankoski Hospital                                                                    |                                                                                                                                                                                                                                                                                                                                                                                                                                                                                                                                                                                                                                                                                                                                                                                                                                                                                                                                                                                                                                                                                                                                                                                                                                                                                                                                                                                                                                                                                                                                                                                                                                                                                                                                                                                         |
| Laakso Hospital, Helsinki                                                               |                                                                                                                                                                                                                                                                                                                                                                                                                                                                                                                                                                                                                                                                                                                                                                                                                                                                                                                                                                                                                                                                                                                                                                                                                                                                                                                                                                                                                                                                                                                                                                                                                                                                                                                                                                                         |
| Lahti City Hospital                                                                     |                                                                                                                                                                                                                                                                                                                                                                                                                                                                                                                                                                                                                                                                                                                                                                                                                                                                                                                                                                                                                                                                                                                                                                                                                                                                                                                                                                                                                                                                                                                                                                                                                                                                                                                                                                                         |
| Lapland Central Hospital, Rovaniemi                                                     |                                                                                                                                                                                                                                                                                                                                                                                                                                                                                                                                                                                                                                                                                                                                                                                                                                                                                                                                                                                                                                                                                                                                                                                                                                                                                                                                                                                                                                                                                                                                                                                                                                                                                                                                                                                         |
| Lappeenranta Health Center                                                              |                                                                                                                                                                                                                                                                                                                                                                                                                                                                                                                                                                                                                                                                                                                                                                                                                                                                                                                                                                                                                                                                                                                                                                                                                                                                                                                                                                                                                                                                                                                                                                                                                                                                                                                                                                                         |
| Lohja Hospital                                                                          |                                                                                                                                                                                                                                                                                                                                                                                                                                                                                                                                                                                                                                                                                                                                                                                                                                                                                                                                                                                                                                                                                                                                                                                                                                                                                                                                                                                                                                                                                                                                                                                                                                                                                                                                                                                         |
| Länsi-Uusimaa Hospital, Tammisaari                                                      |                                                                                                                                                                                                                                                                                                                                                                                                                                                                                                                                                                                                                                                                                                                                                                                                                                                                                                                                                                                                                                                                                                                                                                                                                                                                                                                                                                                                                                                                                                                                                                                                                                                                                                                                                                                         |
| Loimaa Health Center                                                                    |                                                                                                                                                                                                                                                                                                                                                                                                                                                                                                                                                                                                                                                                                                                                                                                                                                                                                                                                                                                                                                                                                                                                                                                                                                                                                                                                                                                                                                                                                                                                                                                                                                                                                                                                                                                         |
| Malmi Hospital, Helsinki                                                                |                                                                                                                                                                                                                                                                                                                                                                                                                                                                                                                                                                                                                                                                                                                                                                                                                                                                                                                                                                                                                                                                                                                                                                                                                                                                                                                                                                                                                                                                                                                                                                                                                                                                                                                                                                                         |
| Mikkeli Central Hospital                                                                |                                                                                                                                                                                                                                                                                                                                                                                                                                                                                                                                                                                                                                                                                                                                                                                                                                                                                                                                                                                                                                                                                                                                                                                                                                                                                                                                                                                                                                                                                                                                                                                                                                                                                                                                                                                         |
| Mänttä Regional Hospital                                                                |                                                                                                                                                                                                                                                                                                                                                                                                                                                                                                                                                                                                                                                                                                                                                                                                                                                                                                                                                                                                                                                                                                                                                                                                                                                                                                                                                                                                                                                                                                                                                                                                                                                                                                                                                                                         |
| North Karelian Hospital, Joensuu                                                        |                                                                                                                                                                                                                                                                                                                                                                                                                                                                                                                                                                                                                                                                                                                                                                                                                                                                                                                                                                                                                                                                                                                                                                                                                                                                                                                                                                                                                                                                                                                                                                                                                                                                                                                                                                                         |
| Nurmijärvi Health Center                                                                |                                                                                                                                                                                                                                                                                                                                                                                                                                                                                                                                                                                                                                                                                                                                                                                                                                                                                                                                                                                                                                                                                                                                                                                                                                                                                                                                                                                                                                                                                                                                                                                                                                                                                                                                                                                         |
| Oulaskangas Hospital, Oulainen                                                          |                                                                                                                                                                                                                                                                                                                                                                                                                                                                                                                                                                                                                                                                                                                                                                                                                                                                                                                                                                                                                                                                                                                                                                                                                                                                                                                                                                                                                                                                                                                                                                                                                                                                                                                                                                                         |
| Oulu Health Center                                                                      |                                                                                                                                                                                                                                                                                                                                                                                                                                                                                                                                                                                                                                                                                                                                                                                                                                                                                                                                                                                                                                                                                                                                                                                                                                                                                                                                                                                                                                                                                                                                                                                                                                                                                                                                                                                         |
| Oulu University Hospital                                                                |                                                                                                                                                                                                                                                                                                                                                                                                                                                                                                                                                                                                                                                                                                                                                                                                                                                                                                                                                                                                                                                                                                                                                                                                                                                                                                                                                                                                                                                                                                                                                                                                                                                                                                                                                                                         |
| Päijät-Häme Central Hospital                                                            |                                                                                                                                                                                                                                                                                                                                                                                                                                                                                                                                                                                                                                                                                                                                                                                                                                                                                                                                                                                                                                                                                                                                                                                                                                                                                                                                                                                                                                                                                                                                                                                                                                                                                                                                                                                         |

|                                              |                                                                          |
|----------------------------------------------|--------------------------------------------------------------------------|
| Palokka Health Center                        | V.Ilvesmäki, H.Miettinen                                                 |
| Pieksämäki Hospital                          | P.Sopanen, L.Welling                                                     |
| Pietarsaari Hospital                         | V.Sevtsenko, M.Tamminen                                                  |
| Pori City Hospital                           | M-L.Holmbäck, B.Isomaa, L.Sarelin                                        |
| Porvoo Hospital                              | P.Ahonen, P.Merisalo, E.Muurinen, K.Sävelä                               |
| Raahe Hospital                               | M.Kallio, B.Rask, S.Rämö                                                 |
| Rauma Hospital                               | A.Holma, M.Honkala, A.Tuomivaara, R.Vainionpää                           |
| Riihimäki Hospital                           | K.Laine, K.Saarinen, T.Salminen                                          |
| Salo Hospital                                | P.Aalto, E.Immonen, L.Juurinen                                           |
| Satakunta Central Hospital, Pori             | A.Alanco, J.Lapinleimu, P.Rautio, M.Virtanen                             |
|                                              | M.Asola, M.Juhola, P.Kunelius, M.-L.Lahdenmäki,                          |
|                                              | P.Pääkkönen, M.Rautavirta                                                |
| Savonlinna Central Hospital                  | T.Pulli, P.Sallinen, M.Taskinen, E.Tolvanen, T.Tuominen                  |
|                                              | H.Valtonen, A.Vartia, S-L.Viitanen                                       |
| Seinäjäki Central Hospital                   | O.Antila, E.Korpi-Hyövälti, T.Latvala, E.Leijala, T.Leikkari, M.Punkari  |
|                                              | N.Rantamäki, H.Vähävuori                                                 |
| South Karelia Central Hospital, Lappeenranta | T.Ensala, E.Hussi, R.Härkönen, U.Nyholm, J.Toivanen                      |
| Tampere Health Center                        | A.Vaden, P.Alarotu, E.Kujansuu, H.Kirkkopelto-Jokinen,                   |
|                                              | M.Helin, S.Gummerus, L.Calonius, T.Niskanen, T.Kaitala,                  |
|                                              | T.Vatänen                                                                |
| Tampere University Hospital                  | P. Hannula, I.Ala-Houhala, R.Kannisto, T.Kuningas, P.Lampinen, M.Määttä, |
|                                              | H.Oksala, T.Oksanen, A.Putila, H.Saha, K.Salonen, H.Tauriainen,          |
|                                              | S.Tulokas                                                                |
| Tiirismaa Health Center, Hollola             | T.Kivelä, L.Petlin, L.Savolainen                                         |
| Turku Health Center                          | A.Artukka, I.Hämäläinen, L.Lehtinen, E.Pyysalo, H.Virtamo, M.Viinikkala, |
| M.Vähätalo                                   |                                                                          |
| Turku University Central Hospital            | K.Breitholz, R.Eskola, K.Metsärinne, U.Pietilä,                          |
|                                              | P.Saarinen, R.Tuominen, S.Äyräpää                                        |
| Vaajakoski Health Center                     | K.Mäkinen, P.Sopanen                                                     |
| Valkeakoski Regional Hospital                | S.Ojanen, E.Valtonen, H.Ylönen, M.Rautiainen,                            |
|                                              | T.Immonen                                                                |
| Vammala Regional Hospital                    | I.Isomäki, R.Kroneld, L.Mustaniemi, M.Tapiolinna-Mäkelä                  |
| Vasa Central Hospital                        | S.Bergkulla, U.Hautamäki, V-A.Myllyniemi, I.Rusk                         |
